# Supplementary material for: Impact assessment of terrestrial and marine air-mass on the constituents and intermixing of bioaerosols over coastal atmosphere
Source: Copernicus journal article supplement (doi:10.5194/egusphere-2024-841), 2024-05-02
Supplement: Supplementary file 1 [file egusphere-2024-841-supplement.pdf]

*Supplement of*

**Impact assessment of terrestrial and marine air-mass on the constituents  
and intermixing of bioaerosols over coastal atmosphere**

Qun He<sup>a</sup>, Zhaowen Wang<sup>a</sup>, Houfeng Liu<sup>a</sup>, Pengju Xu<sup>a</sup>, Changliang Nie<sup>b</sup>, Xueyun Geng<sup>b</sup>,  
Jianmin Chen<sup>b,\*</sup>, Min Wei<sup>a,b,\*</sup>

<sup>a</sup> College of Geography and Environment, Shandong Normal University, Ji'nan 250014,  
China

<sup>b</sup> Shanghai Key Laboratory of Atmospheric Particle Pollution and Prevention (LAP<sup>3</sup>), Fudan  
Tyndall Centre, Department of Environmental Science & Engineering, Fudan University,  
Shanghai 200433, China

\* Correspondence to: Jianmin Chen (jmchen@fudan.edu.cn) & Min Wei  
([minwei@sdu.edu.cn](mailto:minwei@sdu.edu.cn))

**Table S1 Sample classification and description influenced by different air masses**

| Group                                                   |                   | Samples |        |         |        |        |        |        |        |        |        |
|---------------------------------------------------------|-------------------|---------|--------|---------|--------|--------|--------|--------|--------|--------|--------|
|                                                         | Date              | 19-Jan  | 20-Jan | 1-Mar   | 9-Mar  | 11-Mar | 12-Mar | 22-Mar | 23-Mar | 24-Mar | 25-Mar |
| TE                                                      | PM <sub>2.5</sub> | 51.35   | 124.67 | 30.58   | 16.5   | 65.63  | 38.21  | 53.05  | 77.46  | 84.42  | 60.83  |
|                                                         | Sample            | WH_1    | WH_2   | WH_7    | WH_8   | WH_10  | WH_11  | WH_15  | WH_16  | WH_17  | WH_18  |
|                                                         | Date              | 21-Jan  | 16-Mar | 21-Mar  | 29-Mar |        |        |        |        |        |        |
| MA                                                      | PM <sub>2.5</sub> | 7.92    | 12.38  | 15.37   | 25.38  |        |        |        |        |        |        |
|                                                         | Sample            | WH_3    | WH_13  | WH_14   | WH_20  |        |        |        |        |        |        |
|                                                         | Date              | 26-Feb  | 27-Feb | 28-Feb  | 10-Mar | 14-Mar | 27-Mar |        |        |        |        |
| MIX                                                     | PM <sub>2.5</sub> | 41.12   | 60.61  | 41      | 51.63  | 36.42  | 64.69  |        |        |        |        |
|                                                         | Sample            | WH_4    | WH_5   | WH_6    | WH_9   | WH_12  | WH_19  |        |        |        |        |
| PM <sub>2.5</sub> concentration<br>(µg/m <sup>3</sup> ) | <35               | 35-75   | 75-150 | 150-250 | >250   |        |        |        |        |        |        |

TE, terrestrial air mass; MA, marine air mass; MIX, mix air mass.

**Table S2 Indicator bacterial and fungal species influenced by different air masses**

| Group     | Bacteria           |                  |                    | Fungi        |             |            |
|-----------|--------------------|------------------|--------------------|--------------|-------------|------------|
|           | TE                 | MA               | MIX                | TE           | MA          | MIX        |
| TE/MA/MIX | Enhydrobacter      | Comamonas        |                    |              |             |            |
|           | Cellulosimicrobium | Streptococcus    | Enhydrobacter      | Cladosporium | Aspergillus | Malassezia |
|           | Pleomorphomonas    | Novosphingobium  | Lactobacillus      |              | Coprinellus | Alternaria |
|           |                    | Aerococcus       |                    |              |             |            |
| TE/MA     |                    | Comamonas        |                    |              |             |            |
|           | Lactobacillus      | Streptococcus    |                    | Cladosporium |             |            |
|           | Deinococcus        | Novosphingobium  |                    | Alternaria   | Coprinellus |            |
|           | Enhydrobacter      | Aerococcus       |                    | Malassezia   |             |            |
|           | Sphingomonas       | Delftia          |                    |              |             |            |
|           |                    | Erysipelothrix   |                    |              |             |            |
| MA/MIX    |                    | Chryseobacterium | Enhydrobacter      |              |             |            |
|           |                    |                  | Lactobacillus      |              |             |            |
|           |                    | Comamonas        | Cloacibacterium    |              | Aspergillus | Malassezia |
|           |                    | Streptococcus    | Cellulosimicrobium |              | Coprinellus | Alternaria |
|           |                    | Novosphingobium  | Pleomorphomonas    |              |             |            |
|           |                    | Aerococcus       | Deinococcus        |              |             |            |
|           |                    | Sphingomonas     |                    |              |             |            |

TE, terrestrial air mass; MA, marine air mass; MIX, mix air mass.

**Table S3 Ecological of functions of bacterial and fungal communities influenced by different air masses**

| Group     | Bacteria                      |                                  |                               | Fungi                                                                    |                                   |                                      |
|-----------|-------------------------------|----------------------------------|-------------------------------|--------------------------------------------------------------------------|-----------------------------------|--------------------------------------|
|           | TE                            | MA                               | MIX                           | TE                                                                       | MA                                | MIX                                  |
| TE/MA/MIX | animal_parasites_or_symbionts |                                  | aerobic_chemoheterotrophy     | Animal Pathogen-Undefined                                                |                                   | Animal Pathogen-Undefined Saprotroph |
|           | human_pathogens_al            | hydrocarbon_degradati            | animal_parasites_or_symbionts | Saprotroph                                                               | Dung Saprotroph-Plant Saprotroph- | Animal Pathogen-Endophyte-Plant      |
|           | 1                             | human_gut                        | human_pathogens_a             | Endophyte-Plant Pathogen-Wood                                            | Wood Saprotroph                   | Pathogen-Wood Saprotroph             |
|           |                               | mammal_gut                       | II                            | Saprotroph                                                               |                                   |                                      |
| TE/MA     |                               | aromatic_compound_degradation    |                               | Animal Pathogen-Endophyte-Lichen Parasite-Plant Pathogen-Wood Saprotroph |                                   |                                      |
|           | animal_parasites_or_symbionts | human_gut                        |                               | Saprotroph                                                               | Dung Saprotroph-Plant Saprotroph- |                                      |
|           | human_pathogens_al            | mammal_gut                       |                               | Animal Pathogen-Endophyte-Plant                                          | Wood Saprotroph                   |                                      |
|           | 1                             | hydrocarbon_degradati            |                               | Pathogen-Wood Saprotroph                                                 |                                   |                                      |
|           | plant_pathogen                | aromatic_hydrocarbon_degradation |                               | Animal Pathogen-Undefined                                                |                                   |                                      |
|           |                               | plastic_degradation              |                               | Saprotroph                                                               |                                   |                                      |

|               |                               |                          |                                                                   |                                                  |
|---------------|-------------------------------|--------------------------|-------------------------------------------------------------------|--------------------------------------------------|
|               |                               |                          |                                                                   | <b>Animal Pathogen-<br/>Undefined Saprotroph</b> |
|               | <b>aerobic_chemoheterotr</b>  |                          |                                                                   | <b>Animal Pathogen-<br/>Endophyte-Plant</b>      |
|               | <b>ophy</b>                   | <b>hydrocarbon_degra</b> |                                                                   | <b>Pathogen-Wood</b>                             |
| <b>MA/MIX</b> | <b>animal_parasites_or_sy</b> | <b>dation</b>            | <b>Dung Saprotroph-<br/>Plant Saprotroph-<br/>Wood Saprotroph</b> | <b>Saprotroph</b>                                |
|               | <b>mbionts</b>                | <b>human_gut</b>         |                                                                   | <b>Animal Pathogen-<br/>Endophyte-Lichen</b>     |
|               | <b>human_pathogens_all</b>    | <b>mammal_gut</b>        |                                                                   | <b>Parasite-Plant</b>                            |
|               | <b>nitrate_reduction</b>      |                          |                                                                   | <b>Pathogen-Wood<br/>Saprotroph</b>              |

---

TE, terrestrial air mass; MA, marine air mass; MIX, mix air mass.

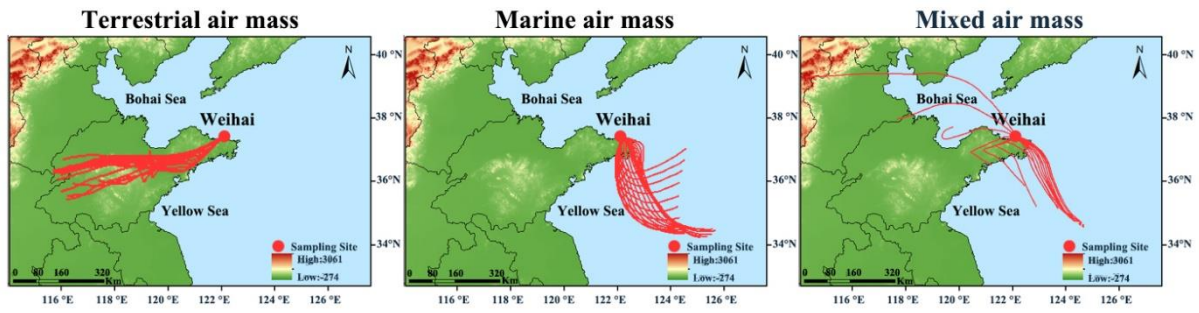

**Fig. S1** The Sampling site in the coastal city of Weihai, Northern China, and the typical terrestrial, marine, and mixed air-mass are indicated.

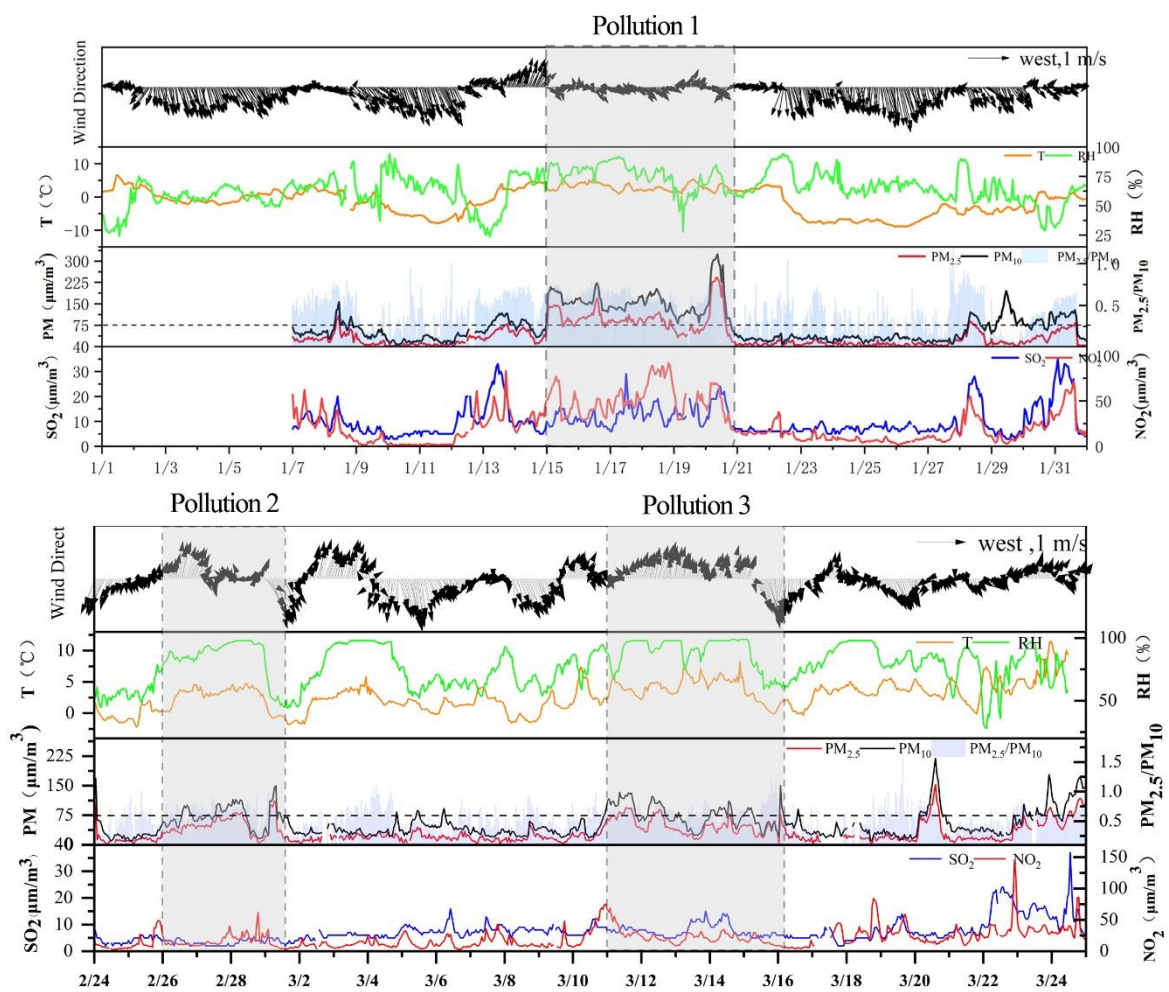

**Fig. S2** Three typical heavy pollution episodes were examined to investigate variations of air mass during the sampling period

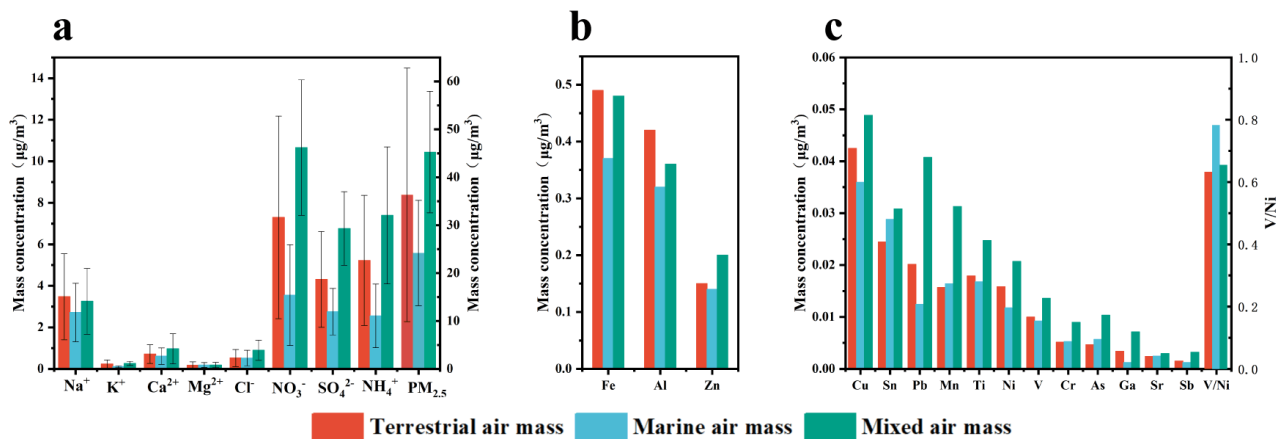

**Fig.S3. Water-soluble ions (a) and metal element concentration (b, c) in  $\text{PM}_{2.5}$  influenced by terrestrial, marine and mix air mass.**

(a) Terrestrial air mass

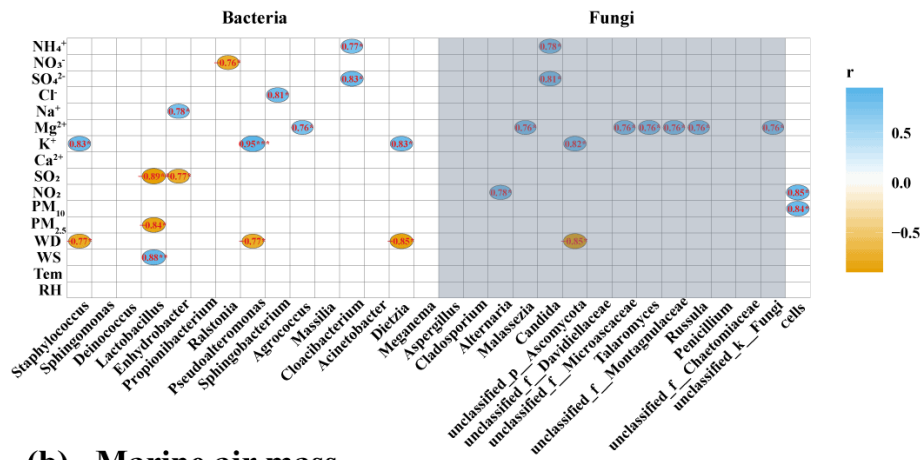

(b) Marine air mass

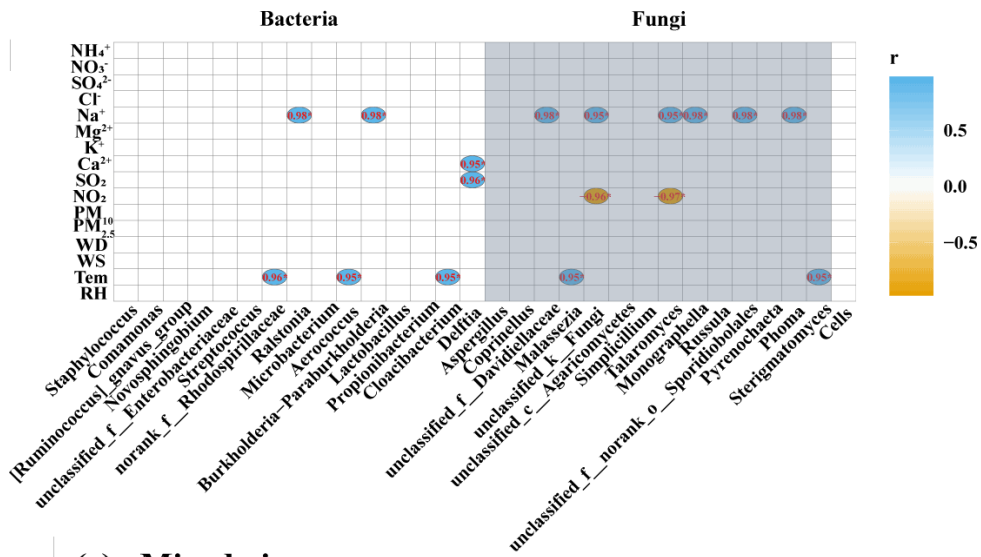

(c) Mixed air mass

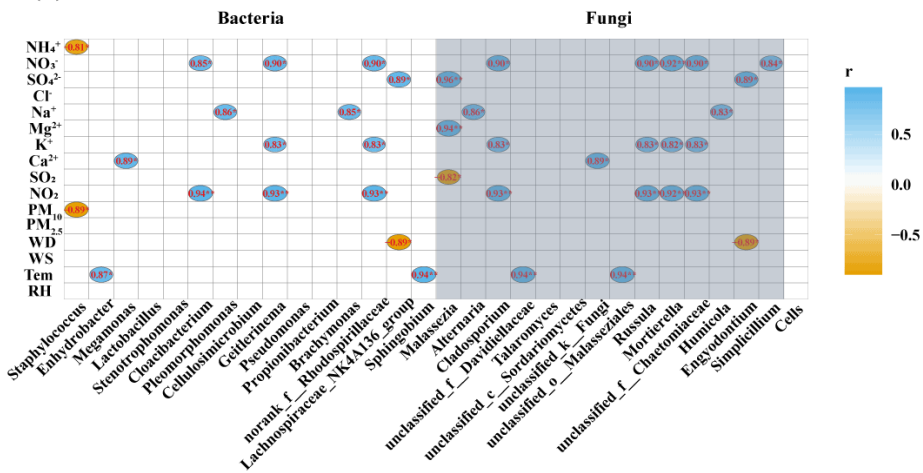

Fig. S4 Relationships between microorganisms and environmental factors under the influence of different air masses, continental air masses (a) marine air masses (b) and mixed air masses (c)
